# Supplementary material
Source: PubMed Central journal article supplement (PMC3979732)
Supplement: NIHMS569286-supplement-Sequences.pdf [file NIHMS569286-supplement-Sequences.pdf]

**Supplementary material for the paper “Evolution of increased complexity in a molecular machine” Finnigan, et al. Nature 2011**

| <b>Supplemental Item</b>                                                                                                                | <b>Page</b> |
|-----------------------------------------------------------------------------------------------------------------------------------------|-------------|
| <b>S1.</b> GenBank accession IDs for protein sequences used in this study                                                               | 2           |
| <b>S2.</b> Maximum likelihood phylogeny of protein sequences used in this study                                                         | 5           |
| <b>S3.</b> Protein sequence alignment of contemporary <i>S. cerevisiae</i> proteolipids with reconstructed Anc.3-11 and Anc.16          | 6           |
| <b>S4.</b> Protein sequence alignment of contemporary <i>S. cerevisiae</i> proteolipids with reconstructed Anc.3-11, Anc.11, and Anc.3  | 7           |
| <b>S5.</b> Yeast strains and vectors used in this study.                                                                                | 8           |
| <b>S6.</b> Ancestral sequence reconstruction (ASR) error as a function of insertion-deletion rate in simulated analysis                 | 10          |
| <b>S7.</b> Functional growth assays of Anc.3-11 and Anc.16 lacking critical glutamic acid residues in contemporary <i>S. cerevisiae</i> | 11          |
| <b>S8.</b> Alternate ancestral states in Anc.3-11 and Anc.16                                                                            | 12          |
| <b>S9.</b> Western blot analysis of yeast expressing ancestral proteins                                                                 | 13          |

## Supplement S1

GenBank accession IDs for protein sequences used in this study. The IDs are labeled with the first letter of their genus, the full name of their species, and an integer number. 3, 11, and 16 indicate homology to yeast subunits c, c', and c'', respectively.

M\_musculus\_16 NP\_291095  
O\_mordax\_3 ACO09611  
D\_rerio\_3 NP\_001098606  
M\_grisea\_16 XP\_369356  
M\_grisea\_11 XP\_366989  
A\_niger\_3 XP\_001399935  
C\_glabrata\_3 XP\_447321  
A\_terreus\_11 XP\_001214955  
A\_terreus\_16 XP\_001211600  
C\_parvum\_16 XP\_627363  
P\_vivax\_16 XP\_001616329  
T\_castaneum\_3 XP\_967959  
X\_tropicalis\_3 NP\_988893  
G\_zeae\_3 XP\_390178  
L\_elongisporus\_3 XP\_001526092  
A\_fumigatus\_3 XP\_001263225  
M\_grisea\_3 XP\_365764  
S\_pombe\_3 NP\_594799  
C\_albicans\_3 XP\_721376  
B\_bovis\_16 XP\_001612047  
G\_zeae\_11 XP\_388749  
C\_muris\_3 XP\_002141961  
S\_purpuratus\_3 XP\_797801  
C\_immitis\_16 XP\_001246494  
M\_mulatta\_16 XP\_001097275  
Y\_lipolytica\_3 XP\_505831  
B\_fuckeliana\_16 XP\_001552198  
C\_immitis\_11 XP\_001242880  
A\_mellifera\_16 XP\_392599  
L\_elongisporus\_11 XP\_001523616  
T\_annulata\_16 XP\_953463  
N\_vectensis\_3 XP\_001637733  
S\_Salar\_16 NP\_001134021  
L\_elongisporus\_16 XP\_001525467  
C\_neoformans\_16 XP\_773114  
C\_neoformans\_11 XP\_778255  
P\_knowlesi\_16 XP\_002261350  
A\_terreus\_3 XP\_001213329  
A\_pisum\_3 NP\_001155531  
S\_Salar\_3 NP\_001154112  
P\_marneffeii\_3 XP\_002152865  
P\_stipitis\_3 XP\_001387092  
A\_gossypii\_3 NP\_984787  
C\_hominis\_3 XP\_667190  
C\_muris\_16 XP\_002142524  
X\_laevis\_16 NP\_001087741  
M\_mulatta\_3 XP\_001088617  
M\_brevicollis\_16 XP\_001742805  
K\_lactis\_3 XP\_454966  
T\_castaneum\_16 XP\_975026

C\_intestinalis\_16 XP\_002131348  
E\_caballus\_3 XP\_001915231  
G\_zeae\_16 XP\_385476  
C\_globosum\_3 XP\_001229170  
A\_clavatus\_3 XP\_001271234  
N\_crassa\_11 XP\_965807  
N\_crassa\_16 XP\_964449  
X\_tropicalis\_16 NP\_001017064  
P\_anserina\_11 XP\_001907168  
P\_anserina\_16 XP\_001910317  
H\_sapiens\_16 AAP36886  
T\_annulata\_3 XP\_952989  
A\_gossypii\_11 NP\_985409  
A\_gossypii\_16 NP\_983473  
A\_pisum\_16 NP\_001155679  
N\_crassa\_3 XP\_961418  
V\_polyspora\_3 XP\_001642185  
T\_adhaerens\_3 XP\_002112261  
S\_cerevisiae\_3 NP\_010887  
P\_marneffeii\_16 XP\_002145395  
D\_hansenii\_3 XP\_460869  
S\_pombe\_11 NP\_593600  
T\_guttata\_3 ACH45347  
S\_pombe\_16 NP\_594516  
B\_fuckeliana\_3 XP\_001553113  
T\_adhaerens\_16 XP\_002114348  
S\_cerevisiae\_16 NP\_011891  
R\_norvegicus\_3 NP\_033859  
S\_cerevisiae\_11 NP\_015090  
B\_taurus\_3 NP\_001017954  
C\_familiaris\_3 XP\_537002  
P\_anserina\_3 XP\_001911041  
P\_marneffeii\_11 XP\_002147471  
P\_knowlesi\_3 XP\_002259621  
T\_guttata\_16 NP\_001232246  
B\_fuckeliana\_11 CCD51873  
C\_cinerea\_okayama\_3 XP\_001835649  
P\_falciparum\_16 XP\_001350256  
C\_intestinalis\_3 XP\_002132074  
A\_niger\_11 XP\_001391591  
A\_niger\_16 XP\_001397102  
C\_parvum\_3 XP\_627909  
S\_purpuratus\_16 XP\_790651  
B\_floridae\_3 XP\_002598155  
Y\_lipolytica\_16 XP\_505205  
A\_mellifera\_3 NP\_001011570  
A\_clavatus\_16 XP\_001275839  
N\_vectensis\_16 XP\_001638230  
A\_clavatus\_11 XP\_001274195  
S\_sclerotiorum\_3 XP\_001588693  
P\_falciparum\_3 XP\_001351750  
D\_discoideum\_16 XP\_644318  
C\_cinerea\_okayama\_11 XP\_001835902  
D\_hansenii\_16 XP\_460013  
D\_hansenii\_11 XP\_458901  
C\_cinerea\_okayama\_16 XP\_001830694  
P\_vivax\_3 XP\_001613765  
C\_immitis\_3 XP\_001239974  
A\_fumigatus\_16 XP\_755891

C\_neoformans\_3 XP\_772642  
H\_sapiens\_3 AAP36127  
A\_fumigatus\_11 XP\_753781  
Y\_lipolytica\_11 XP\_504637  
M\_brevicollis\_3 XP\_001743042  
D\_discoideum\_3 XP\_644319  
P\_stipitis\_16 XP\_001386908  
C\_albicans\_16 XP\_722165  
C\_albicans\_11 XP\_721376  
P\_stipitis\_11 XP\_001382501  
X\_laevis\_3 NP\_001082675  
C\_glabrata\_11 XP\_445959  
E\_caballus\_16 XP\_001916016  
C\_glabrata\_16 XP\_447739  
V\_polyspora\_11 XP\_001645235  
V\_polyspora\_16 XP\_001646358  
C\_hominis\_16 XP\_665533  
C\_globosum\_11 XP\_001222467  
C\_globosum\_16 XP\_001223715  
O\_mordax\_16 ACO10130  
D\_rerio\_16 NP\_955855  
B\_bovis\_3 XP\_001609797  
B\_floridae\_16 XP\_002610356  
M\_musculus\_3 NP\_033859  
C\_familiaris\_16 XP\_539645  
K\_lactis\_11 XP\_452911  
K\_lactis\_16 XP\_454470  
B\_taurus\_16 NP\_001033127  
S\_sclerotiorum\_16 XP\_001590765  
S\_sclerotiorum\_11 XP\_001595091  
R\_norvegicus\_16 AAH09169

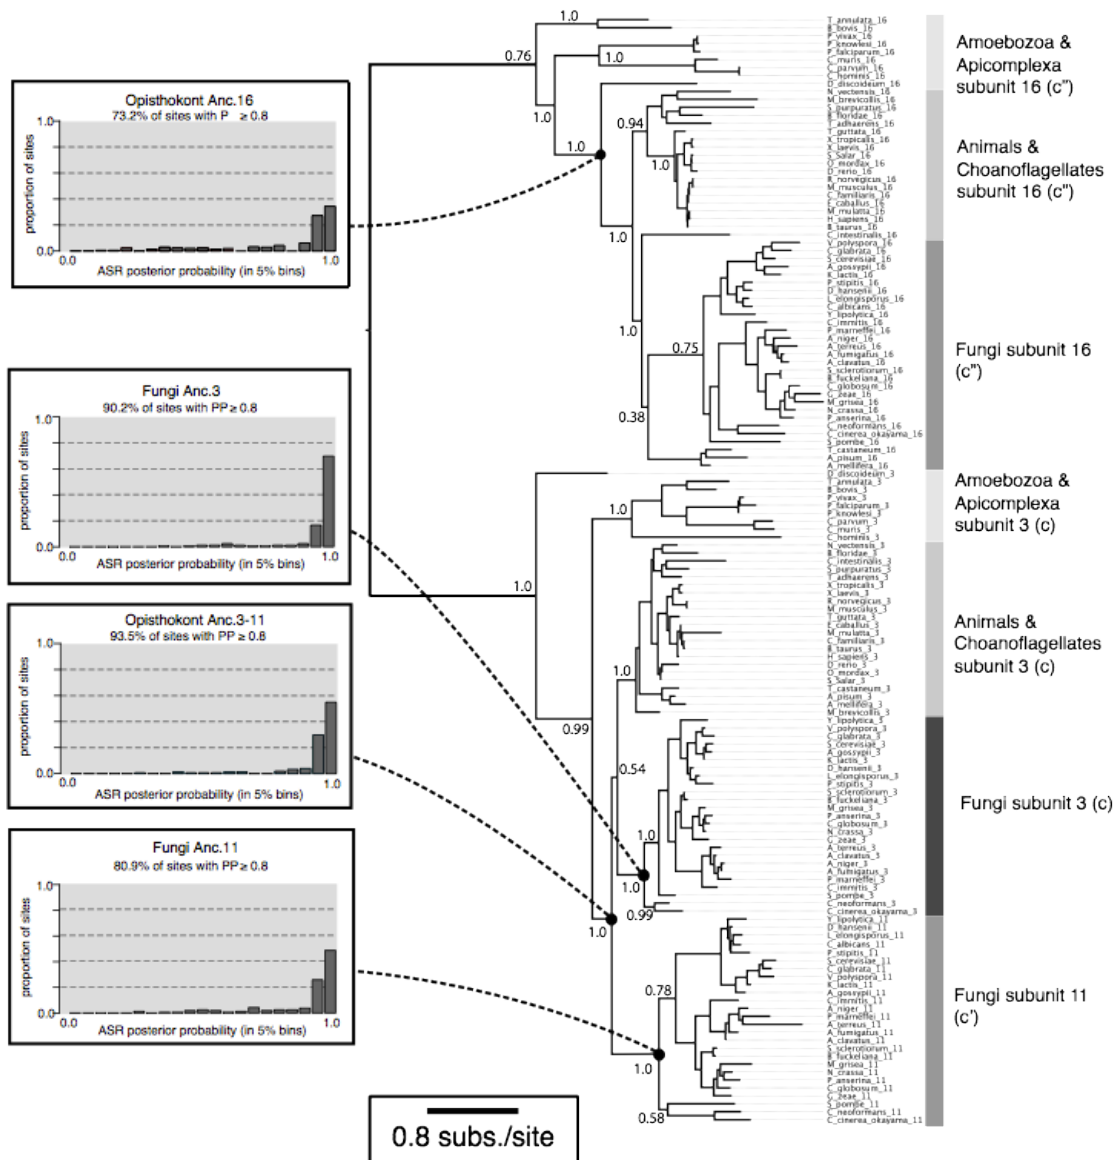

## Supplement S2

Maximum likelihood phylogeny of protein sequences for V-ATPase subunits 3, 11, and 16. Terminal taxa names correspond to sequences in Supplemental S1. Decimals on internal branches are approximate likelihood ratios with the nonparametric Shimodaira–Hasegawa (SH) correction (Anisimova et al., 2011). The inset bar graphs show support for ancestral reconstructions of ancestors Anc 3-11, Anc.16, Anc.3, and Anc.11.

M. Anisimova, M. Gil, J.-F. Dufayard, C. Dessimoz, and O. Gascuel. Survey of branch support methods demonstrates accuracy, power, and robustness of fast likelihood-based approximation schemes. *Systematic Biology*, 60(5), 2011.



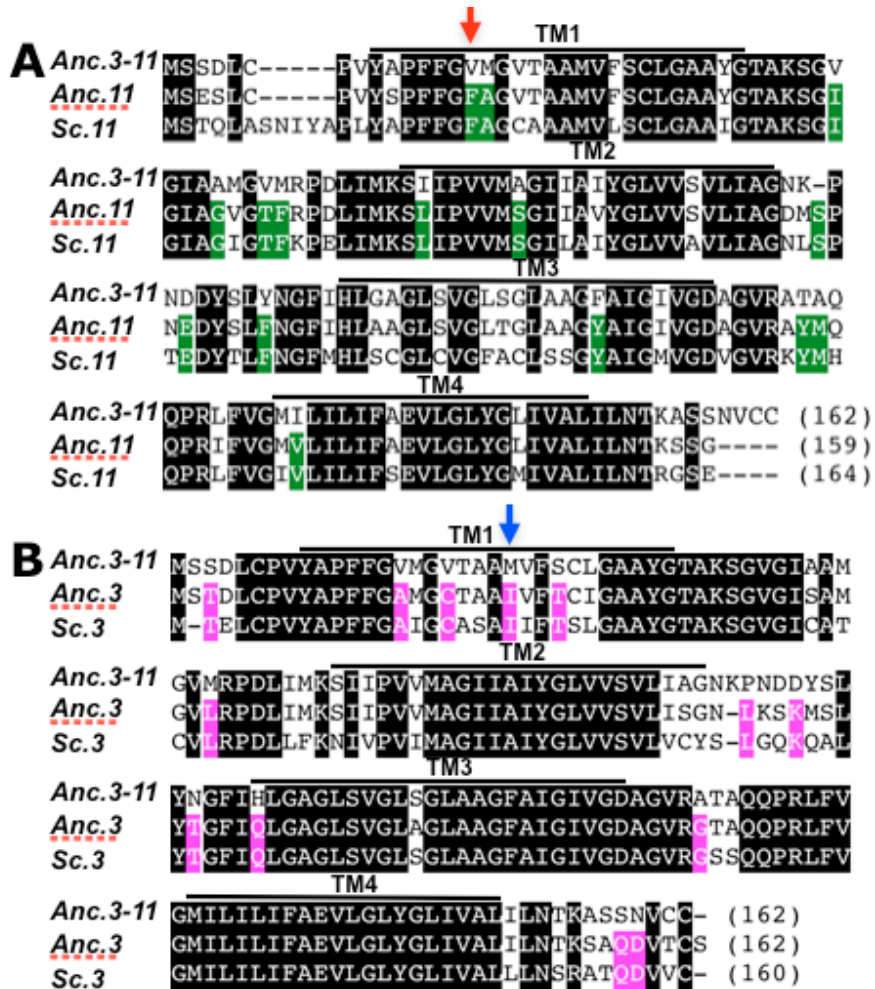

## Supplement S4

Protein sequence alignment of contemporary *S. cerevisiae* proteolipids with reconstructed Anc.3-11 and intermediate ancestors Anc.11, and Anc.3. Potential transmembrane domains are indicated as TM1 through TM4. Identical residues are shown against a black background. **(A)** Anc.3-11 is compared to intermediate ancestor Anc.11 and contemporary yeast subunit 11 (labeled Sc.11). Residues shared exclusively between Anc.11 and Sc.11 are highlighted in green. The red arrow indicates the location of substitution V15F (see main text). **(B)** Anc.3-11 is compared to intermediate ancestor Anc.3 and contemporary yeast subunit 3 (Sc.3). Residues shared by only Anc.3 and Sc.c are highlighted in magenta. The blue arrow indicates the location of substitution M22I (see main text).

## Supplement S5

Yeast strains and vectors used in this study.

Supplemental Table 1. Yeast strains and plasmids used in this study

| <u>Strain</u> | <u>Genotype</u>                                                                          | <u>Reference</u>           |
|---------------|------------------------------------------------------------------------------------------|----------------------------|
| SF838-1Da     | <i>MATa ura3-52 leu2-3,112 his4-519 ade6 pep4-3 gal2</i>                                 | Rothman and Stevens (1986) |
| LGY113        | SF838-1Da; <i>vma3Δ::Kan<sup>R</sup></i>                                                 | Ryan <i>et al.</i> (2008)  |
| LGY114        | SF838-1Da; <i>vma11Δ::Kan<sup>R</sup></i>                                                | Ryan <i>et al.</i> (2008)  |
| LGY115        | SF838-1Da; <i>vma16Δ::Kan<sup>R</sup></i>                                                | Ryan <i>et al.</i> (2008)  |
| LGY125        | SF838-1Da; <i>vma3Δ::Kan<sup>R</sup> vma11Δ::Hyg<sup>R</sup></i>                         | This study                 |
| LGY143        | SF838-1Da; <i>vma3Δ::Kan<sup>R</sup> vma11Δ::Hyg<sup>R</sup> vma16Δ::Nat<sup>R</sup></i> | This study                 |
| LGY124        | SF838-1Da; <i>vma11Δ::Kan<sup>R</sup> vma16Δ::Nat<sup>R</sup></i>                        | This study                 |
| LGY139        | SF838-1Da; <i>vma3Δ::Kan<sup>R</sup> vma16Δ::Nat<sup>R</sup></i>                         | This study                 |

| <u>Plasmid</u> | <u>Description</u>                                               | <u>Reference</u>            |
|----------------|------------------------------------------------------------------|-----------------------------|
| pRS415         | <i>CEN, LEU2</i>                                                 | Simons <i>et al.</i> (1987) |
| pRS316         | <i>CEN, URA3</i>                                                 | Sikorski and Hieter (1989)  |
| pYEP351        | <i>2μ, LEU2</i>                                                  | Hill <i>et al.</i> (1986)   |
| pGF06          | pRS316 <i>VPH1::GFP::HIS5</i>                                    | Ryan <i>et al.</i> (2008)   |
| pGF141         | pRS415 <i>VPH1::GFP::HIS5</i>                                    | This study                  |
| pGF140         | pRS316 <i>prVMA3::Anc.3-11::3xHA::ADH::Nat<sup>R</sup></i>       | This study                  |
| pGF139         | pRS415 <i>prVMA16::Anc.16::3xHA::ADH::Nat<sup>R</sup></i>        | This study                  |
| pGF252         | pRS316 <i>prVMA3::Anc.3-11::3xHA::ADH A41C, E139Q</i>            | This study                  |
| pGF253         | pRS316 <i>prVMA16::Anc.16::3xHA::ADH E98Q</i>                    | This study                  |
| pGF254         | pRS316 <i>VMA3</i>                                               | This study                  |
| pGF499         | pRS316 <i>VMA3 I21A</i>                                          | This study                  |
| pGF500         | pRS316 <i>VMA11</i>                                              | This study                  |
| pGF501         | pRS316 <i>VMA11 F20A</i>                                         | This study                  |
| pGF241         | pRS316 <i>prVMA3::Anc.3-11::3xHA::ADH V15F</i>                   | This study                  |
| pGF239         | pRS316 <i>prVMA3::Anc.3-11::3xHA::ADH A41S</i>                   | This study                  |
| pGF240         | pRS316 <i>prVMA3::Anc.3-11::3xHA::ADH A120G</i>                  | This study                  |
| pGF502         | pRS415 <i>prVMA16::Anc.16(2-30Δ)::3xHA::ADH::Nat<sup>R</sup></i> | This study                  |
| pGF503         | pRS316 <i>prVMA16::Anc.16::3xHA::ADH I58L</i>                    | This study                  |
| pGF504         | pRS316 <i>prVMA16::Anc.16::3xHA::ADH M77I</i>                    | This study                  |
| pGF505         | pRS316 <i>prVMA16::Anc.16::3xHA::ADH K87R</i>                    | This study                  |
| pGF213         | pYEP351 <i>VMA21</i>                                             | This study                  |
| pGF506         | pRS316 <i>prVMA3::Anc.3::3xHA::ADH::Nat<sup>R</sup></i>          | This study                  |
| pGF507         | pRS415 <i>prVMA3::Anc.3::3xHA::ADH::Nat<sup>R</sup></i>          | This study                  |
| pGF508         | pRS316 <i>prVMA3::Anc.11::3xHA::ADH::Nat<sup>R</sup></i>         | This study                  |
| pGF510         | pRS316 <i>prVMA3::Anc.3-11::3xHA::ADH V15A</i>                   | This study                  |
| pGF512         | pRS316 <i>prVMA3::Anc.3-11::3xHA::ADH M22I</i>                   | This study                  |
| pGF513         | pRS316 <i>prVMA3::Anc.3-11::3xHA::ADH S25T</i>                   | This study                  |
| pGF514         | pRS316 <i>prVMA3::Anc.3-11::3xHA::ADH V38I</i>                   | This study                  |
| pGF515         | pRS316 <i>prVMA3::Anc.3-11::3xHA::ADH A42G</i>                   | This study                  |
| pGF517         | pRS316 <i>prVMA3::Anc.3-11::3xHA::ADH V45T</i>                   | This study                  |



|        |                                                                                                                                          |            |
|--------|------------------------------------------------------------------------------------------------------------------------------------------|------------|
| pGF518 | pRS316 <i>prVMA3::Anc.3-11::3xHA::ADH</i> M46L                                                                                           | This study |
| pGF519 | pRS316 <i>prVMA3::Anc.3-11::3xHA::ADH</i> M46F                                                                                           | This study |
| pGF521 | pRS316 <i>prVMA3::Anc.3-11::3xHA::ADH</i> I55L                                                                                           | This study |
| pGF523 | pRS316 <i>prVMA3::Anc.3-11::3xHA::ADH</i> A61S                                                                                           | This study |
| pGF525 | pRS316 <i>prVMA3::Anc.3-11::3xHA::ADH</i> K79L                                                                                           | This study |
| pGF528 | pRS316 <i>prVMA3::Anc.3-11::3xHA::ADH</i> Y87F                                                                                           | This study |
| pGF529 | pRS316 <i>prVMA3::Anc.3-11::3xHA::ADH</i> N88T                                                                                           | This study |
| pGF531 | pRS316 <i>prVMA3::Anc.3-11::3xHA::ADH</i> H92Q                                                                                           | This study |
| pGF534 | pRS316 <i>prVMA3::Anc.3-11::3xHA::ADH</i> F108Y                                                                                          | This study |
| pGF535 | pRS316 <i>prVMA3::Anc.3-11::3xHA::ADH</i> T121Y                                                                                          | This study |
| pGF536 | pRS316 <i>prVMA3::Anc.3-11::3xHA::ADH</i> A122M                                                                                          | This study |
| pGF537 | pRS316 <i>prVMA3::Anc.3-11::3xHA::ADH</i> I132V                                                                                          | This study |
| pGF542 | pRS316 <i>prVMA3::Anc.3-11::3xHA::ADH</i> N159D                                                                                          | This study |
| pGF646 | pRS415 <i>prVMA16::Sc.16(2-41Δ)::Anc.11(2-5Δ)::3xHA::ADH::Nat<sup>R</sup></i><br>pRS415 <i>prVMA16::Anc.11(162-164Δ)::Sc.16(1-41Δ)::</i> | This study |
| pGF647 | <i>3xHA::ADH::Nat<sup>R</sup></i>                                                                                                        | This study |
| pGF648 | pRS415 <i>prVMA16::Sc.16(2-41Δ)::Anc.3-11(1-2Δ)::3xHA::Nat<sup>R</sup></i>                                                               | This study |
| pGF649 | pRS415 <i>prVMA16::Anc.3-11(162Δ)::Sc.16(1-49Δ)::3xHA::Nat<sup>R</sup></i>                                                               | This study |
| pGF650 | pRS415 <i>prVMA16::Sc.16(2-41Δ)::Anc.3(1-2Δ)::3xHA::Nat<sup>R</sup></i>                                                                  | This study |
| pGF651 | pRS415 <i>prVMA16::Anc.3(161-162Δ)::Sc.16(1-49Δ)::3xHA::Nat<sup>R</sup></i>                                                              | This study |

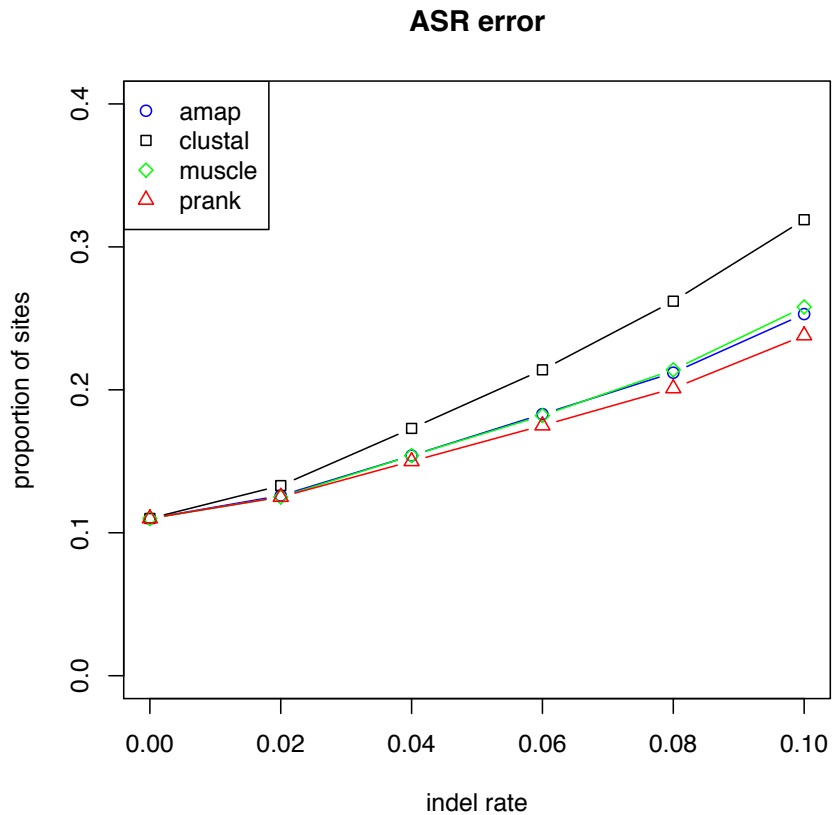

### Supplement S6

Ancestral sequence reconstruction (ASR) error as a function of insertion-deletion (indel) rate. Sequences were simulated on the phylogeny shown in S2, and aligned using four different algorithms: AMAP (Schwartz and Pachter 2007), Clustal (Thompson et al., 1994), MUSCLE (Edgar 2004), and Prank (Loytynoja and Goldman, 2008). We reconstructed the most-recent shared ancestors for the Anc.3-11 sequences and Anc.16 sequences. ASR was measured as the proportion of sites that incorrectly contained an indel character. Data is averaged over five replicates; standard error of the mean is very small ( $<0.001$ ) and not rendered here.

A. S. Schwartz and L. Pachter. Multiple alignment by sequence annealing. *Bioinformatics*, **23**(2):e24–e29, 2007.

D. Thompson, D. G. Higgins, and T. J. Gibson. Clustal W: improving the sensitivity of progressive multiple sequence alignment through sequence weighting position-specific gap penalties and weight matrix choice. *Nucleic Acids Research*, **22**(22):4673–4680, 1994.

Edgar. MUSCLE: multiple sequence alignment with high accuracy and high throughput. *Nucleic Acids Research*, **32**(5):1792–1797, August 2004.

A. Loytynoja and N. Goldman. Phylogeny-aware gap placement prevents errors in sequence alignment and evolutionary analysis. *Science*, **320**(5884):1632–1635, June 2008.

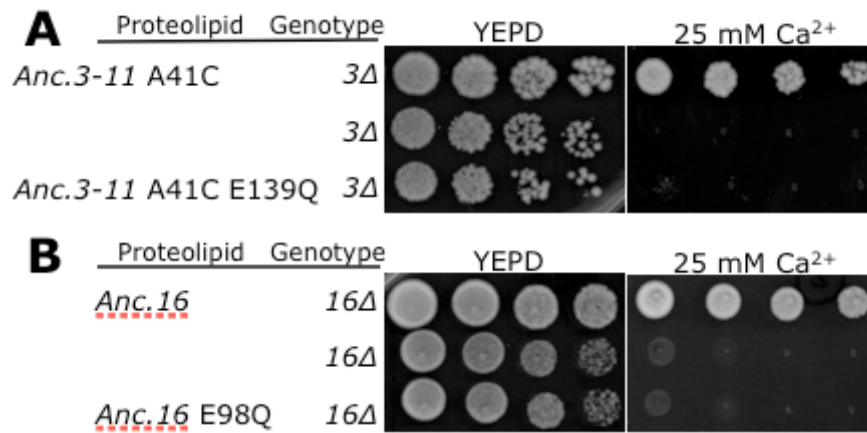

### Supplement S7

Functional growth assays of *Anc.3-11* and *Anc.16* lacking critical glutamic acid residues in contemporary *S. cerevisiae*. Yeast were plated on permissive media (YEPD) and media buffered with 25 mM Ca<sup>2+</sup>. **(A)** A particular allele of *Anc.3-11* (A41C) was used to illustrate the dramatic growth difference when the E139Q substitution is introduced. Mutation of this essential residue causes a complete loss of V-ATPase function. **(B)** The corresponding glutamic acid residue within *Anc.16* is also critical for V-ATPase enzyme function.

| Proteolipid    | Genotype     |               |               |
|----------------|--------------|---------------|---------------|
|                |              | <i>vma3Δ</i>  |               |
|                | <i>vma3Δ</i> | <i>vma11Δ</i> | <i>vma11Δ</i> |
| Anc.3-11       | +++          | ++            | +++           |
| Anc.3-11 V15F  | ++           | ++++          | ++            |
| Anc.3-11 A41S  | ++           | +             | ++            |
| Anc.3-11 A120G | ++           | +             | ++            |
|                |              | <i>vma16Δ</i> |               |
| Anc.16         | +++++        |               |               |
| Anc.16 I58L    | +++++        |               |               |
| Anc.16 M77I    | +++++        |               |               |
| Anc.16 K87R    | +++++        |               |               |
| Anc.16 2-30Δ   | +++++        |               |               |

### Supplement S8

Alternate ancestral states in Anc.3-11 and Anc.16 with posterior probability (pp) greater than 0.20 were tested in mutant yeast strains for V-ATPase function. We restricted our analysis to alternate states not located in sequence regions corresponding to luminal portions of the protein (as predicted by SOSUI, Supplemental S3). The Anc.16 2-30Δ mutant contained 23 residues that had alternate states with greater than 0.20 pp, but nearly identical growth results. Alternate sites were introduced in Anc.3-11 and Anc.16 and their function was independently tested on media containing 25 mM Ca<sup>2+</sup>. The number of “+” characters corresponds to the quality of growth. Wild-type yeast scored five pluses (+++++) and any yeast strain lacking a proteolipid subunit (*3Δ*, *11Δ*, *3Δ11Δ*, or *16Δ*) all scored zero under these conditions.

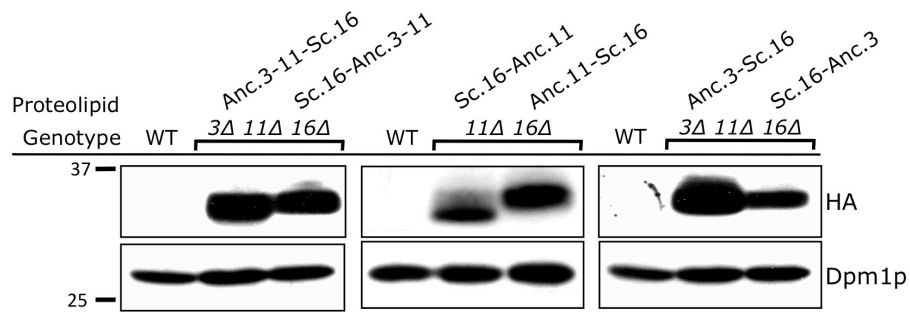

### Supplement S9

Proteolipid gene fusions between yeast subunit 16 and Anc.3-11, Anc.3, or Anc.11 are stably expressed in modern yeast. Whole cell extracts were prepared from strains expressing gene fusion constructs, subjected to Western blot analysis, and probed using anti-HA antibodies or anti-Dpm1 antibodies (loading control). Extracts from wild-type yeast served as negative controls for the anti-HA antibody. The size of the nearest molecular marker (kilodaltons) is shown on the left.
